# Supplementary material for: Using the Avocado to Test the Satiety Effects of a Fat-Fiber Combination in Place of Carbohydrate Energy in a Breakfast Meal in Overweight and Obese Men and Women: A Randomized Clinical Trial
Source: PubMed Central journal article supplement (PMC6567160; doi:10.3390/nu11050952), 2019-04-26
Supplement: nutrients-11-00952-s001.pdf [file nutrients-11-00952-s001.pdf]

**Supplement Table S1.** Hass avocado nutrition facts.

|                               | Hass avocado, Whole | Hass avocado, Half |
|-------------------------------|---------------------|--------------------|
| Weight (g)                    | 136                 | 68                 |
| Calories (kcal)               | 217.6               | 108.8              |
| Fat Calories (kcal)           | 179.4               | 89.7               |
| Saturated fat Calories (kcal) | 26.0                | 13.0               |
| Protein (g)                   | 2.7                 | 1.4                |
| Carbohydrate (g)              | 11.6                | 5.8                |
| Fiber (g)                     | 9.1                 | 4.6                |
| Sugar (g)                     | 0.9                 | 0.5                |
| Fat (g)                       | 19.9                | 10                 |
| Saturated Fat (g)             | 2.9                 | 1.5                |
| Monounsaturated Fat (g)       | 13.3                | 6.7                |
| Polyunsaturated Fat (g)       | 2.5                 | 1.2                |

Source: USDA Nutrient database

(<https://ndb.nal.usda.gov/ndb/foods/show/09038?fgcd=&manu=&format=&count=&max=25&offset=&sort=default&order=asc&qlookup=Hass+Avocados&ds=&qt=&qp=&qq=&qn=&q=&ing=>, accessed April 22, 2019)
